# Supplementary material
Source: MDPI journal article supplement (https://www.mdpi.com/2311-7524/3/3/42)
Supplement: s1 [file s1]

## Supplementary Materials

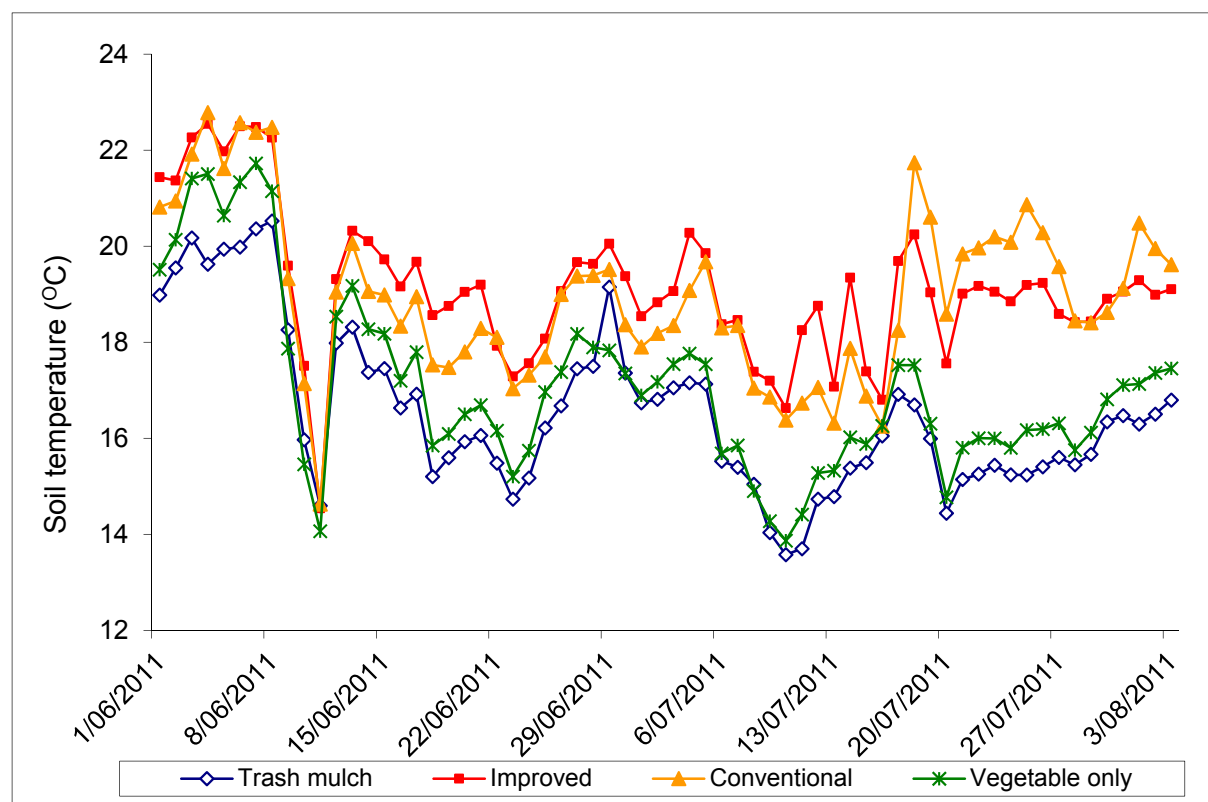

**Figure S1.** Soil temperature recorded at 5 cm depth during the winter zucchini crop, showing the difference between plastic mulch and trash systems.

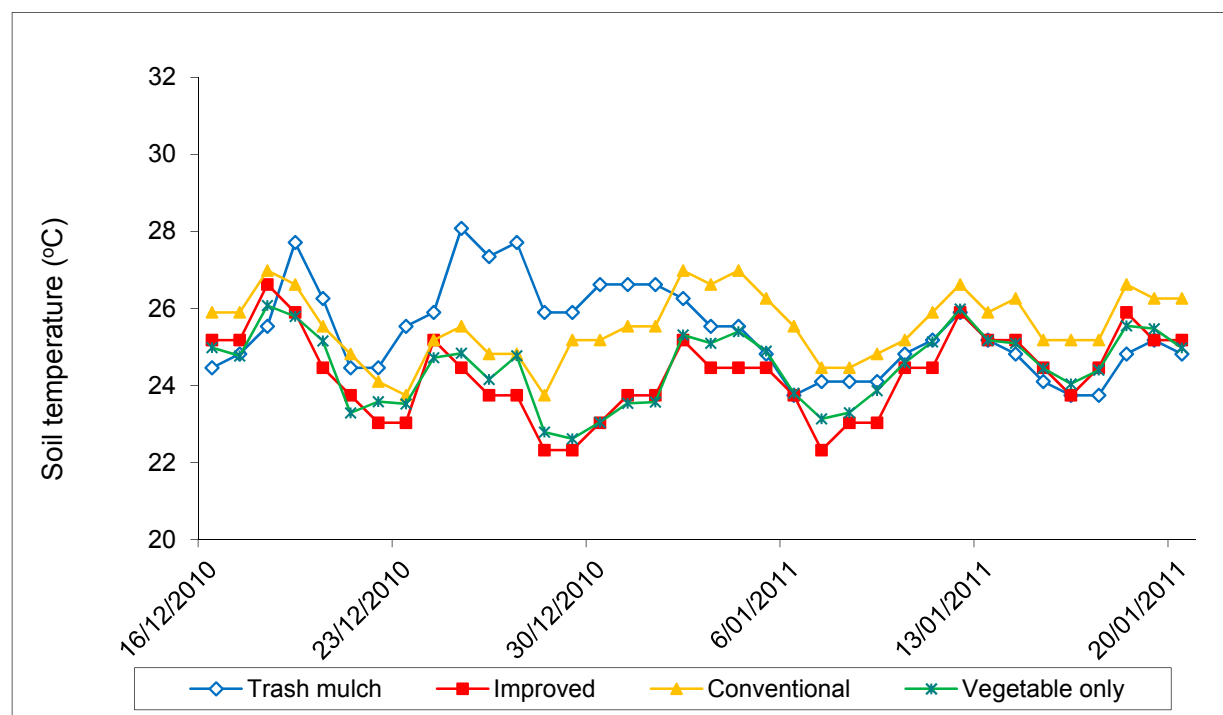

**Figure S2.** Soil temperature recorded at 5 cm depth from December 2010 until late Jan 2011 during the spring/summer capsicum crop, showing the difference between plastic mulch and trash systems.
